# Supplementary material
Source: publisher site journal article supplement (https://www.dovepress.com/get_supplementary_file.php?f=409534.docx)
Supplement: Supplementary file 1 [file get_supplementary_file.php]

**Association Between Skin Acid Mantle, Natural Moisturizing Factors, and Antibacterial Activity Against *S. aureus* in the Stratum Corneum**

**Supplementary data**

**Supplementary Figure 1** Linear regression between DT generated by Soleris Next Generation System using NF-TVC vials and Log CFU number of *S. aureus* ATCC 6538 measured by total plate count on TSA agar.


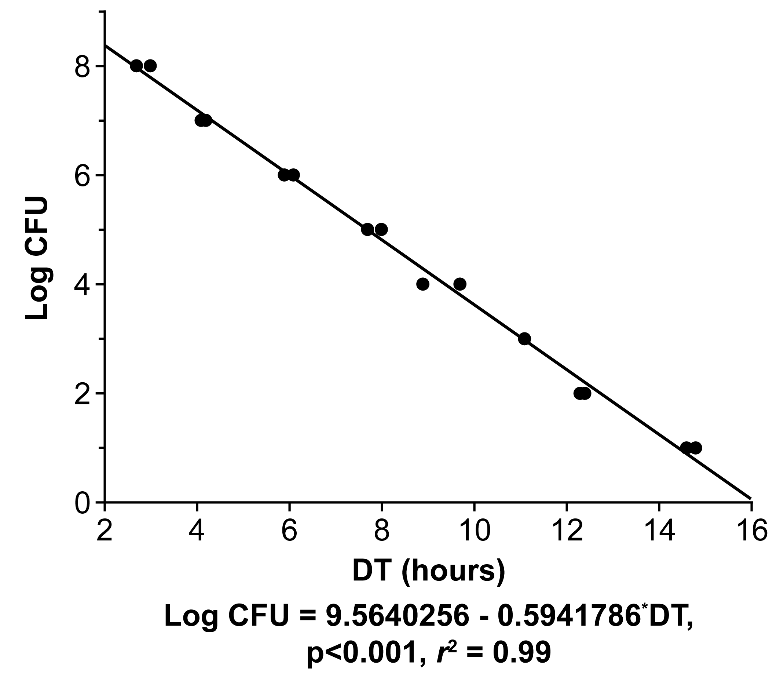


**Abbreviations:** CFU, colony-forming unit; DT, detection time; NF-TVC, Non-fermenting-Total Viable Count; *S. aureus*; *Staphylococcus aureus;* TSA, trypticase soy agar

**Supplementary Figure 2** Distribution of acclimation time after wash for 82 participants.


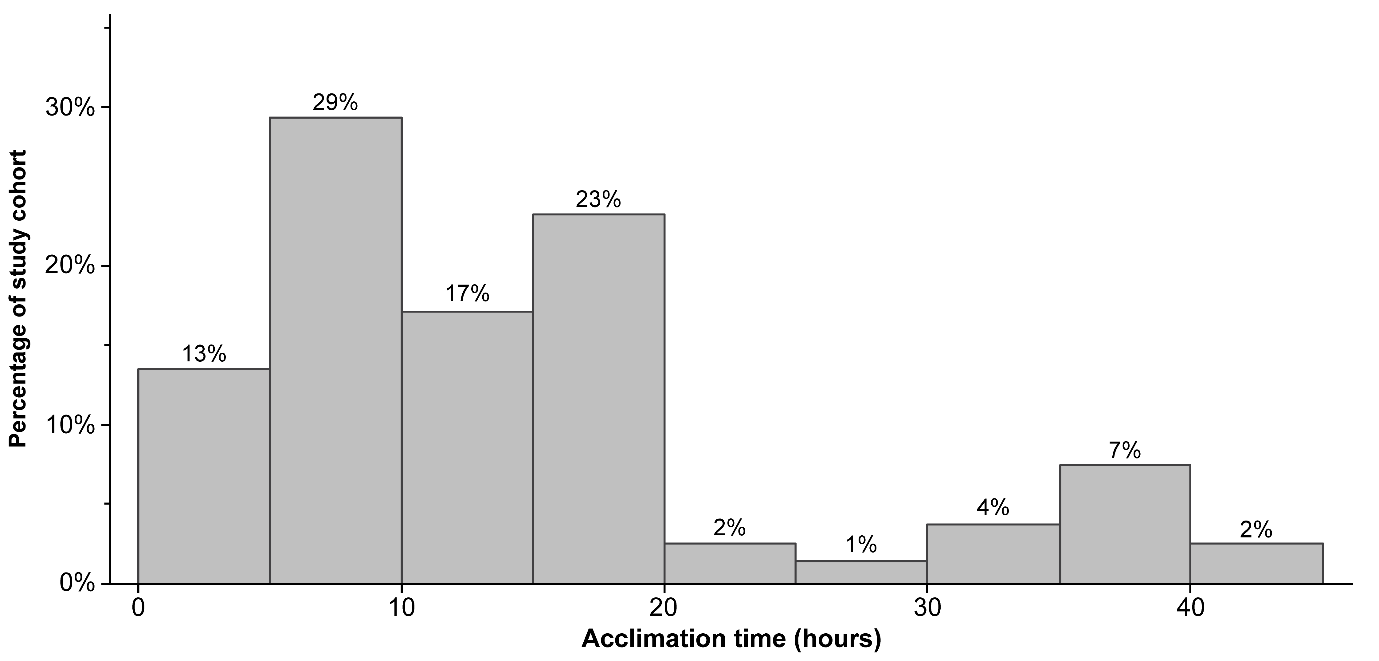


**Supplementary Figure 3** Correlation between skin pH and acclimation time after wash for 82 participants.


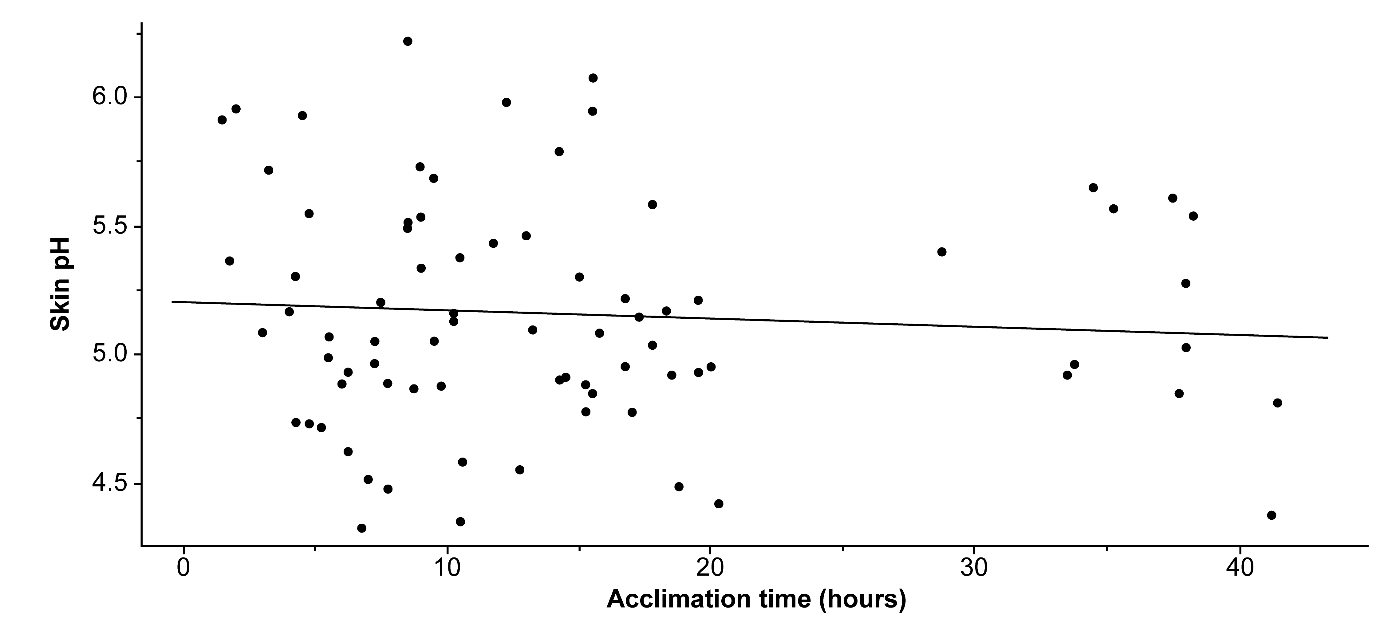


**Notes:** No significant correlation was observed.

**Supplementary Figure 4** Distribution of *S. aureus* Log CFU reduction on SC collected from 82 participants.


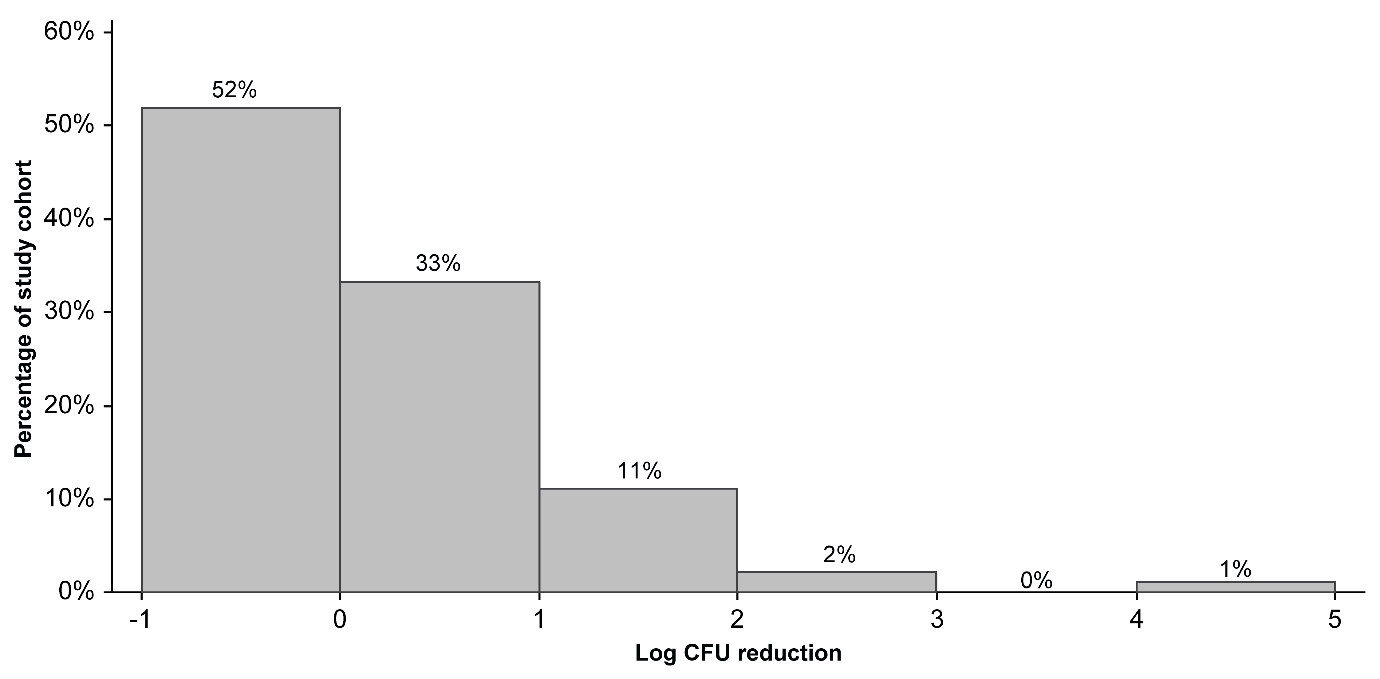


**Supplementary Figure 5** Impact ofproline and histidine on *S. aureus* growth. *S. aureus* cell growth was measured by OD600. Cell density of triplicate cultures grown in presence of 10 mM proline and 10 mM histidine was averaged and recorded at indicated time points.

**
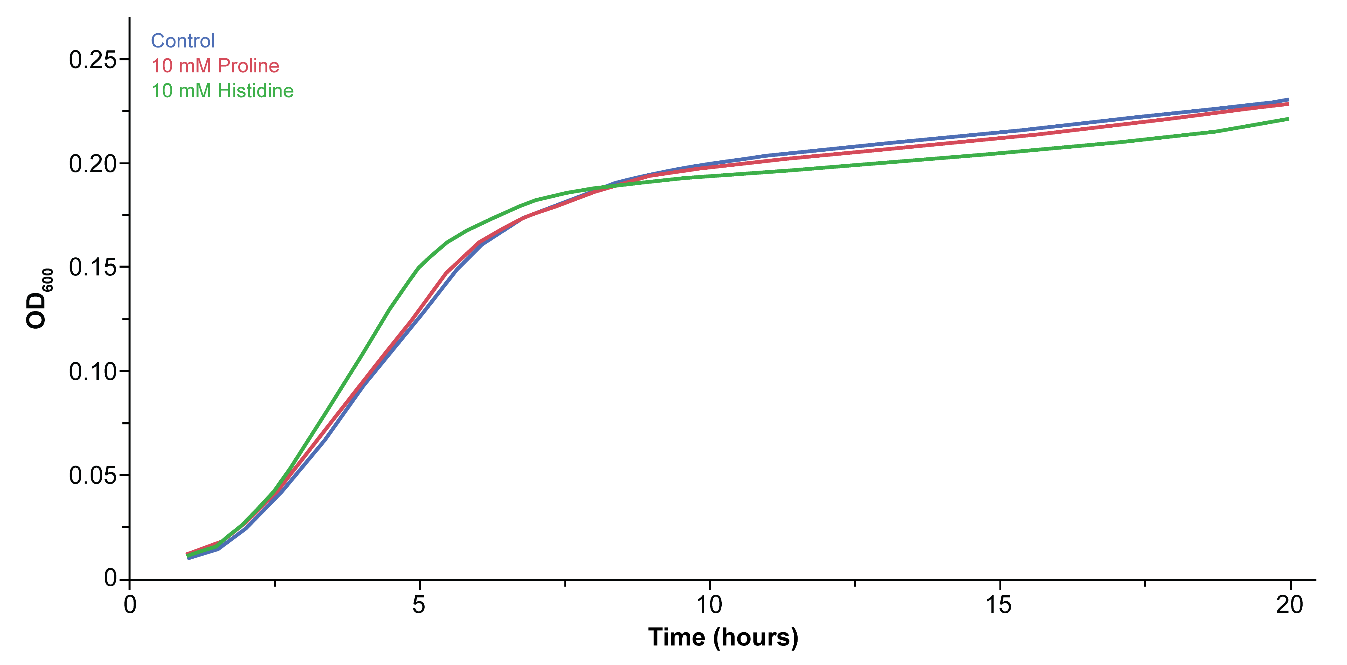
**

**Abbreviations:** *S. aureus*, *Staphylococcus aureus*
